# Supplementary material for: Construction of efficient bismuth/boron-based flexible electrodes in organic media toward neutral hydrogen evolution
Source: Royal Society of Chemistry journal article supplement (doi:10.1039/d1ta09142e), 2021-12-10
Supplement: d1ta09142e1.pdf [file d1ta09142e1.pdf]

## Supporting Information

### **Construction of efficient bismuth/boron-based flexible electrode in organic media toward neutral hydrogen evolution**

Jinli Fan<sup>†a</sup>, Weiju Hao<sup>†a\*</sup>, Chengyu Fu<sup>a</sup>, Ziliang Chen<sup>b</sup>, Rikai Liang<sup>a</sup>, Cheng Lian<sup>c</sup>, Qiang Zhang<sup>a\*</sup>,  
Guisheng Li<sup>a</sup>

<sup>a</sup>University of Shanghai for Science and Technology, Shanghai 200093, PR China.

<sup>b</sup>Institute of Functional Nano & Soft Materials (FUNSOM), Soochow University,  
Suzhou 215123, PR China.

<sup>c</sup>State Key Laboratory of Chemical Engineering, Shanghai Engineering Research  
Center of Hierarchical Nanomaterials, School of Chemistry and Molecular  
Engineering, East China University of Science and Technology, Shanghai 200237, PR  
China.

\* Corresponding author: Weiju Hao. Qiang Zhang

E-mail: [wjhao@usst.edu.cn](mailto:wjhao@usst.edu.cn) [qiangzhang@usst.edu.cn](mailto:qiangzhang@usst.edu.cn)

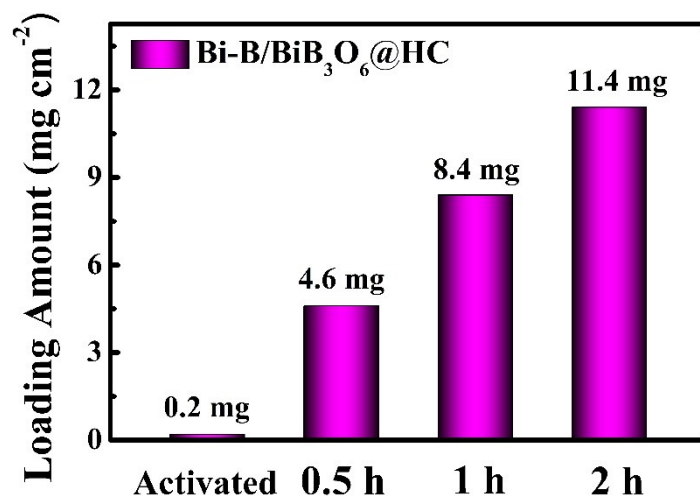

**Fig. S1.** Loading amount of activated Bi-B/BiB<sub>3</sub>O<sub>6</sub> on the HC substrate at different plating time (0.5 h, 1 h and 2 h).

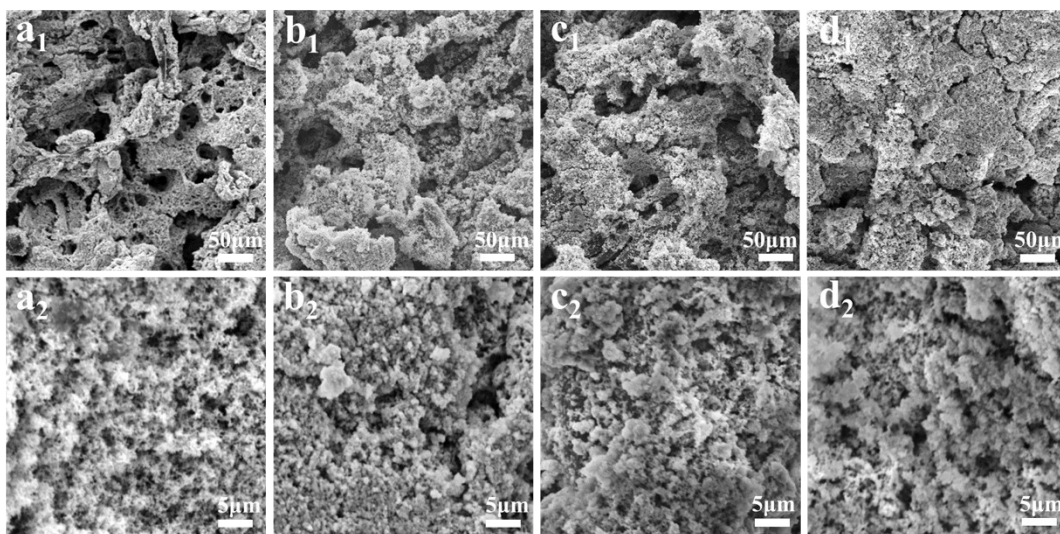

**Fig. S2.** SEM images of Bi-B/BiB<sub>3</sub>O<sub>6</sub>@HC electrode during HER process at 25°C. (a<sub>1</sub>), (a<sub>2</sub>): activated HC; (b<sub>1</sub>), (b<sub>2</sub>): 0.5 h; (c<sub>1</sub>), (c<sub>2</sub>): 1 h; (d<sub>1</sub>), (d<sub>2</sub>): 2 h.

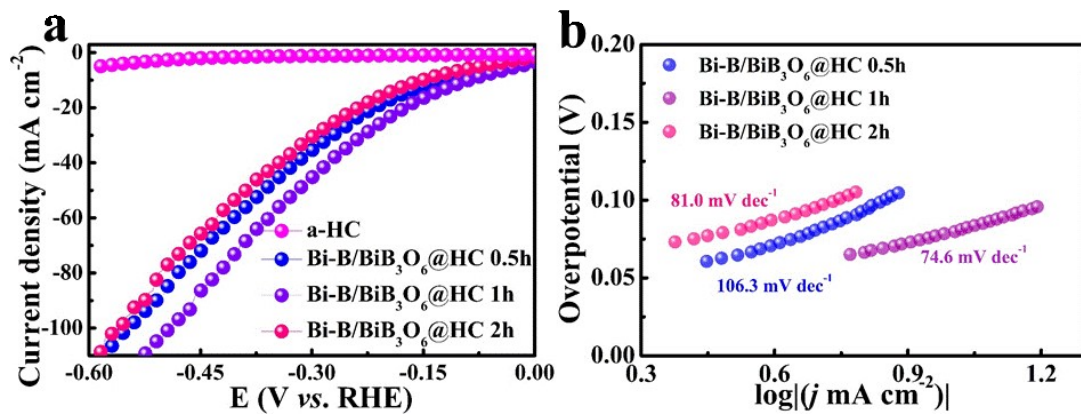

**Fig. S3.** (a) LSV curves; (b) Tafel slopes of Bi-B/Bi<sub>3</sub>O<sub>6</sub>@HC electrode at different electroless plating time without  $iR$ -correction in 1.0 M PBS.

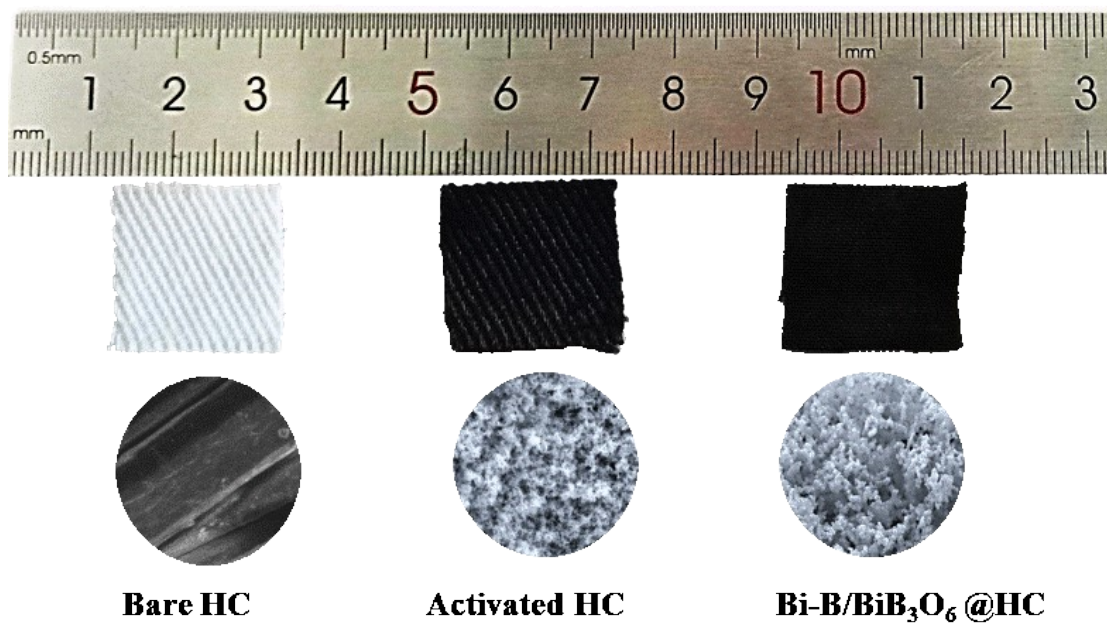

**Fig. S4.** Photograph and SEM images of bare HC, activated HC and Bi-B/BiB<sub>3</sub>O<sub>6</sub>@HC electrodes.

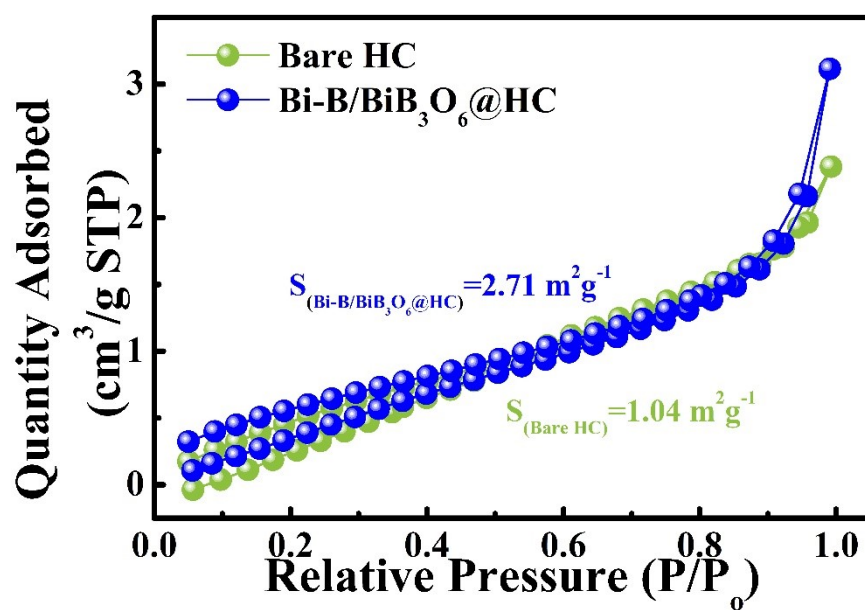

**Fig. S5.** Nitrogen adsorption-desorption isotherm curves of bare HC and Bi-B/BiB<sub>3</sub>O<sub>6</sub>@HC electrodes.

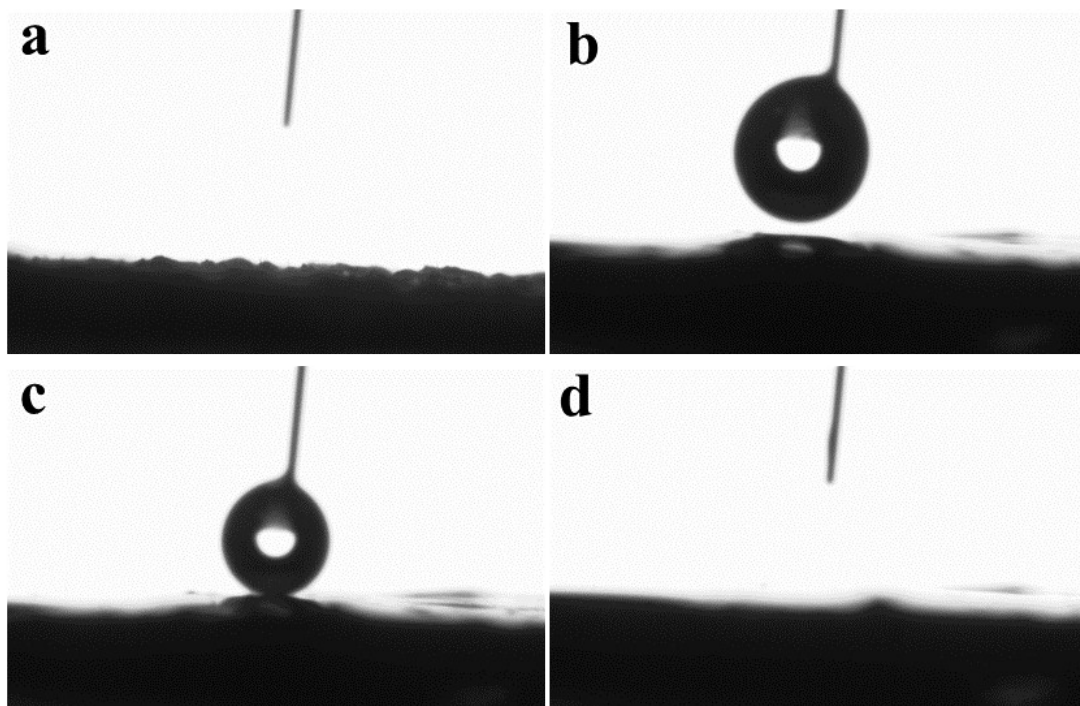

**Fig. S6.** Contact angle measurements of Bi-B/BiB<sub>3</sub>O<sub>6</sub>@HC electrode.

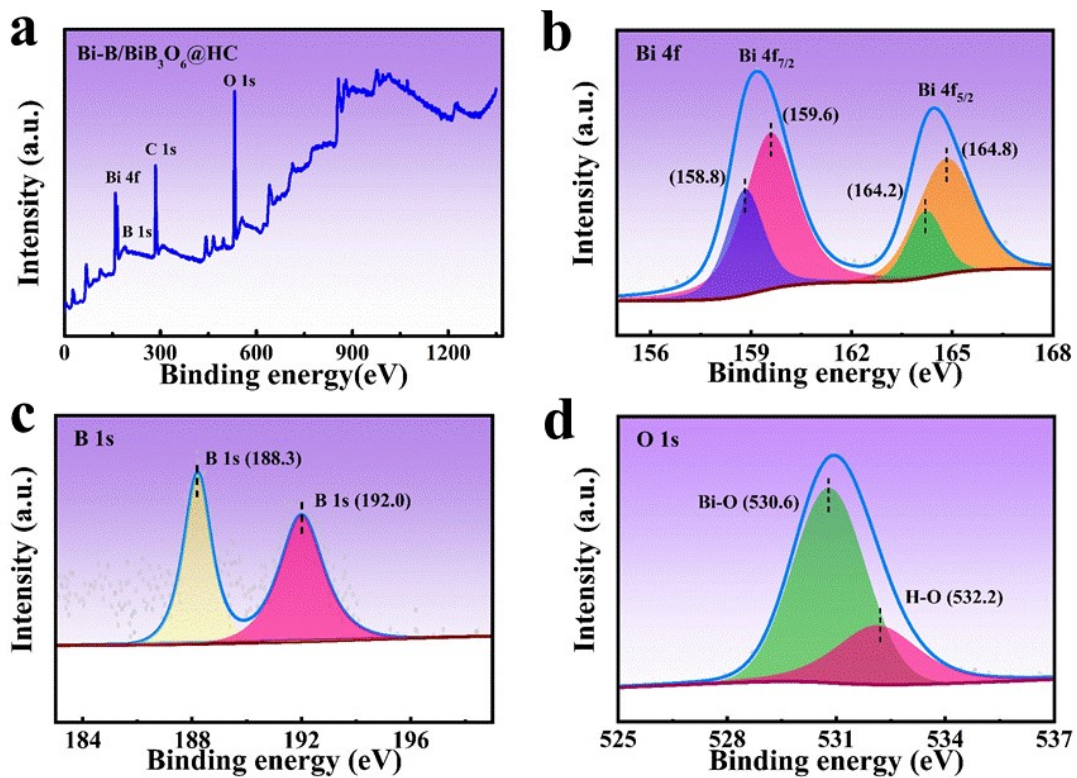

**Fig. S7.** (a) Full XPS patterns of Bi-B/BiB<sub>3</sub>O<sub>6</sub>@HC electrode and the corresponding high-resolution. (b) Bi 4f. (c) B 1s. (d) O 1s.



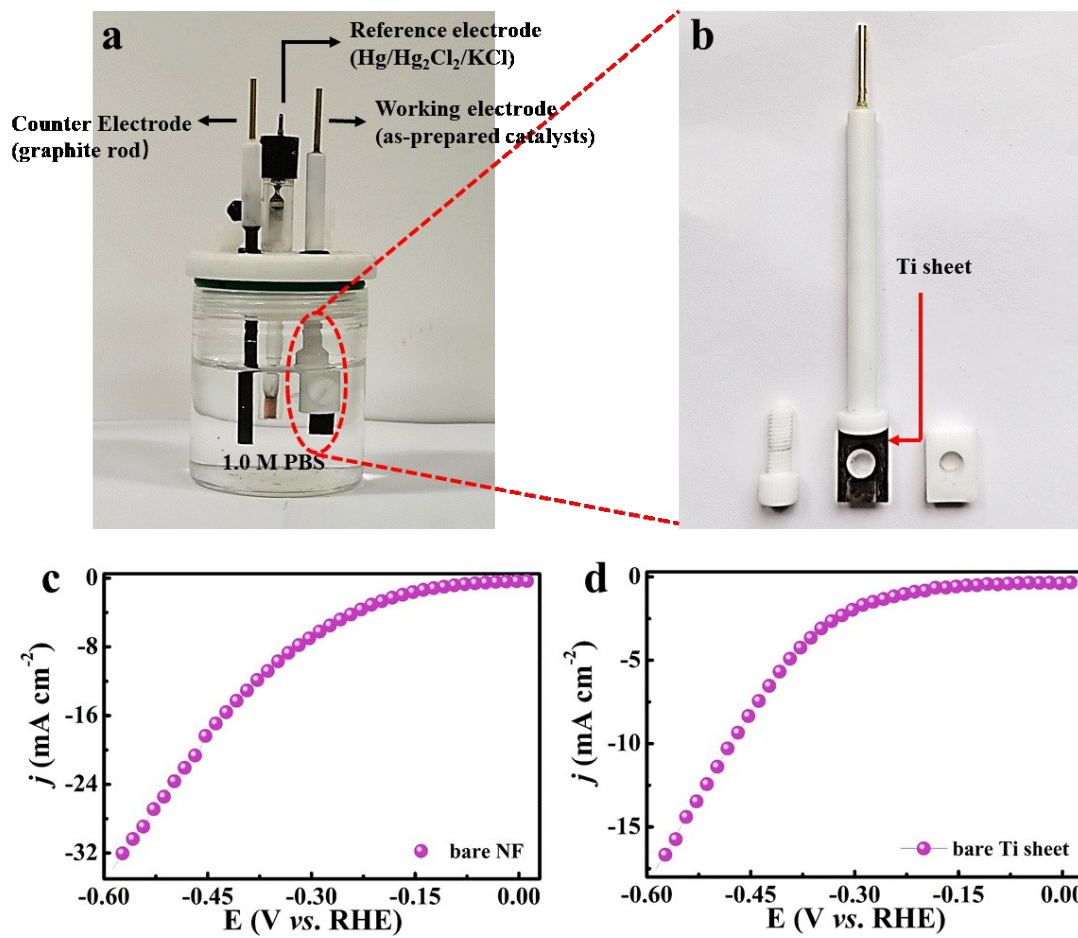

**Fig. S8.** (a) Photograph of the three-electrode cell for neutral water splitting HER measurements; (b) photograph of working electrode; (c) LSV curve of bare NF; (d) LSV curve of bare Ti sheet.

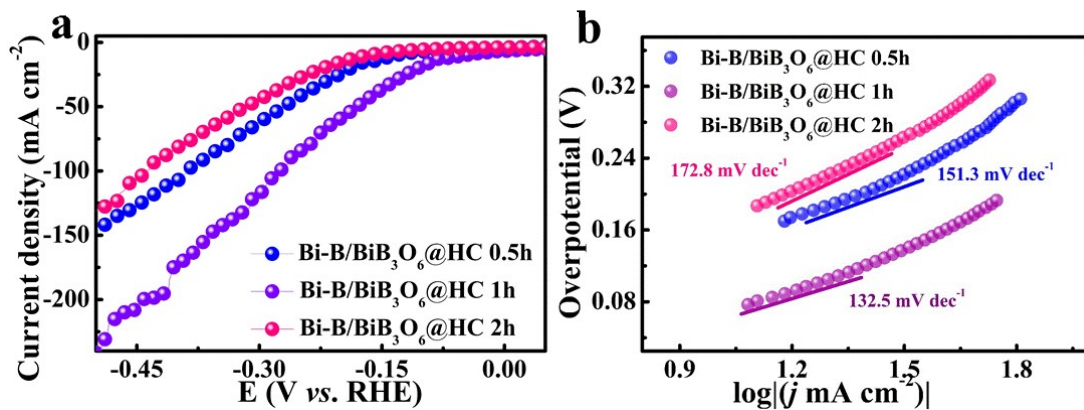

**Fig. S9.** (a) LSV curves; (b) Tafel slopes of Bi-B/Bi<sub>3</sub>O<sub>6</sub>@HC electrode at different electroless plating time without *iR*-correction in 1.0 M KOH + 0.5 M NaCl.

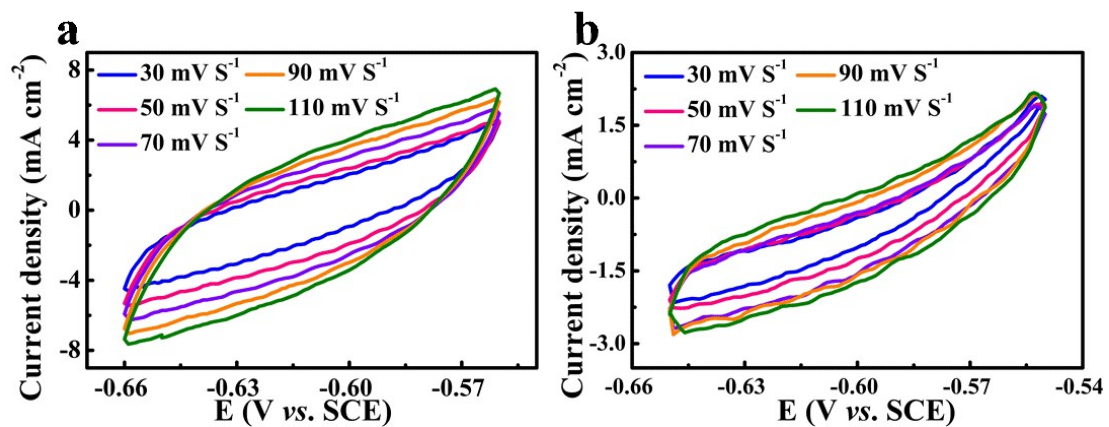

**Fig. S10.** Cyclic voltage (CV) measurements of (a) Bi-B/Bi<sub>3</sub>O<sub>6</sub>@HC and (b) Bi-B/Bi<sub>3</sub>O<sub>6</sub>@NF in the non-Faradaic current range at scan rates of 30, 50, 70, 90 and 110 mV S<sup>-1</sup>.

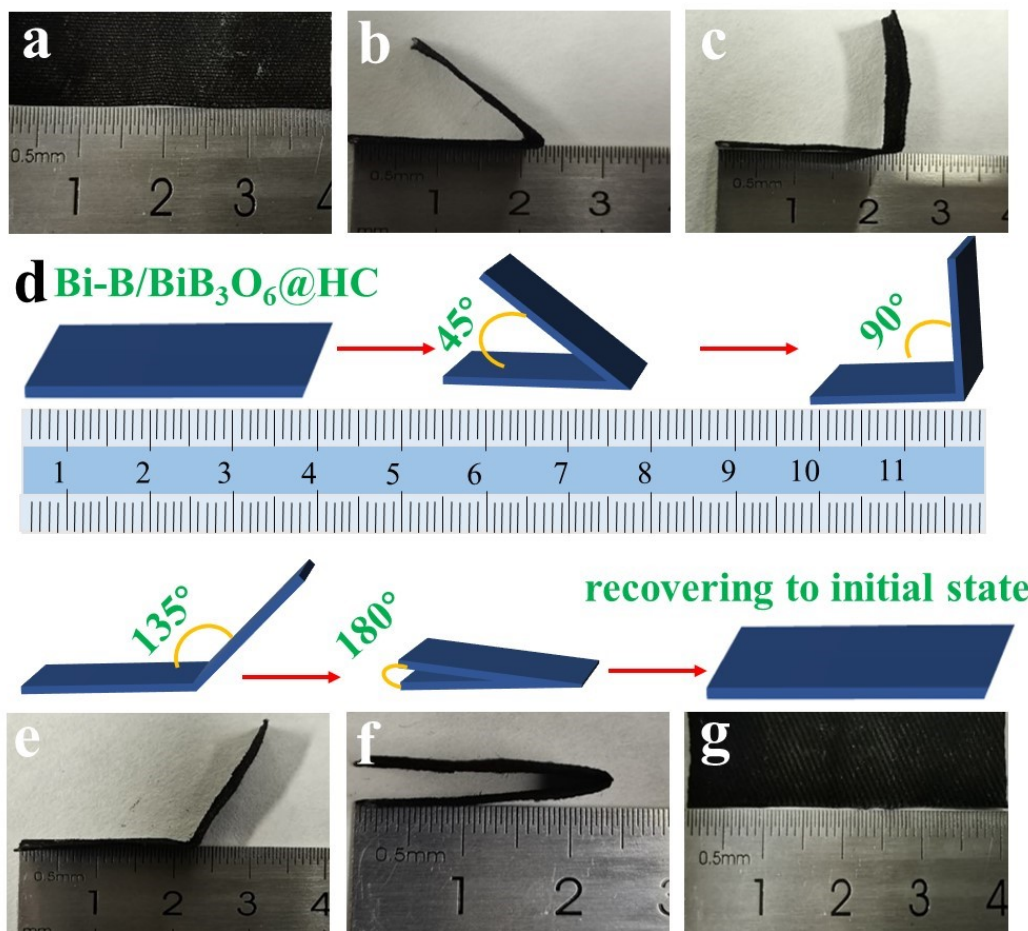

**Fig. S11.** Photograph of folding scheme of Bi-B/BiB<sub>3</sub>O<sub>6</sub>@HC flexible electrode.

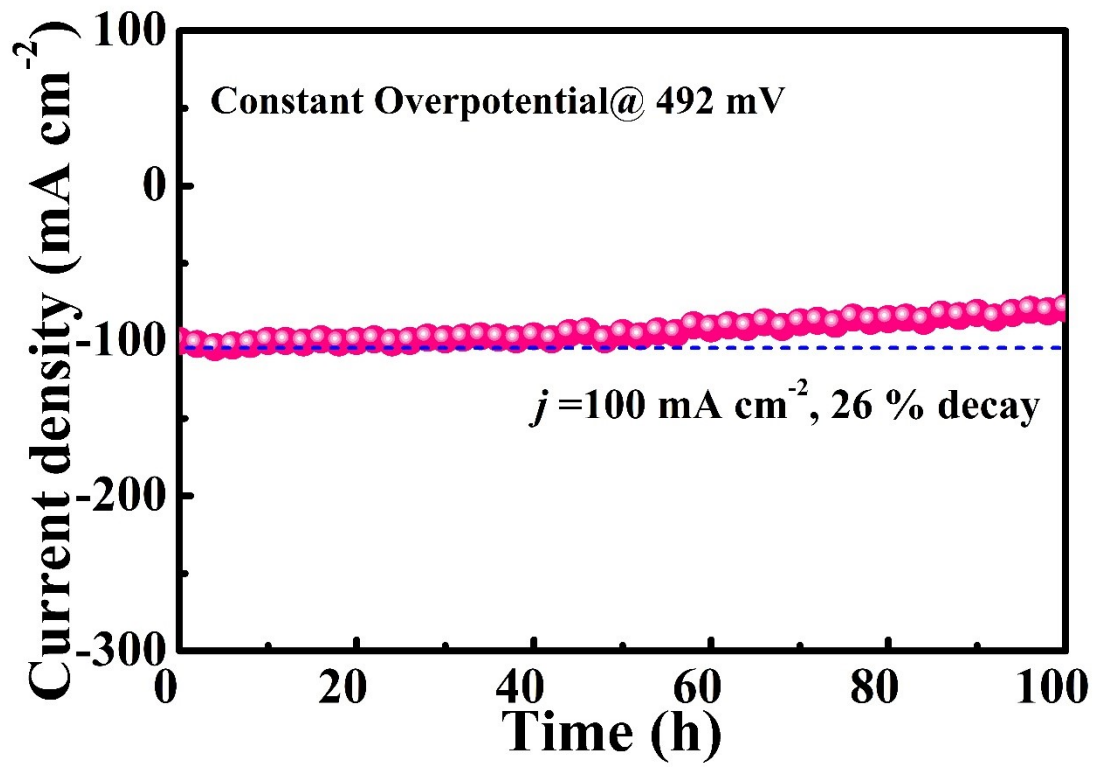

Fig. S12. Chronopotentiometric measurements of stability of Bi-B/BiB<sub>3</sub>O<sub>6</sub>@HC electrode at the current density of 100 mA cm<sup>-2</sup> for 100 h.

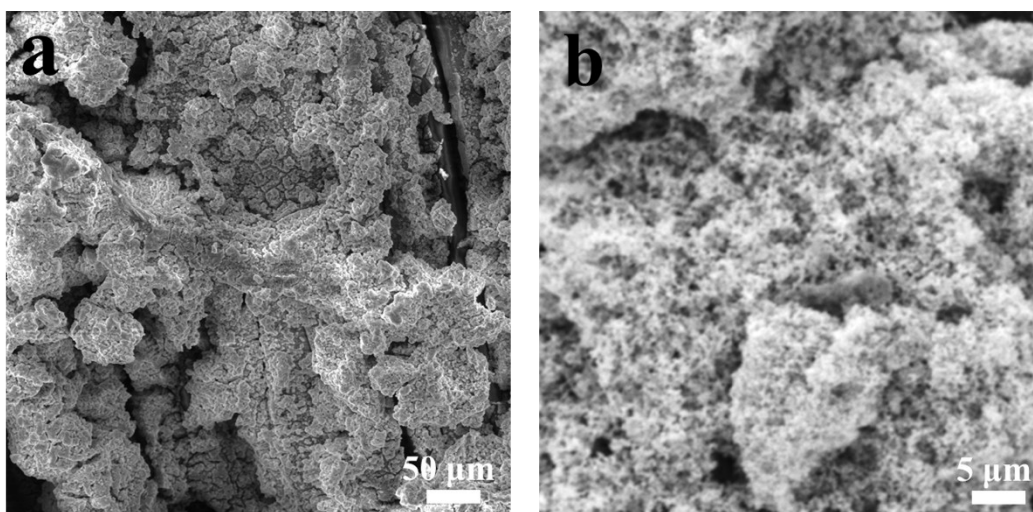

**Fig. S13.** SEM images of chronoamperometric measurements of stability of Bi-B/BiB<sub>3</sub>O<sub>6</sub>@HC electrode at the current density of 100 mA cm<sup>-2</sup> after 36 h.

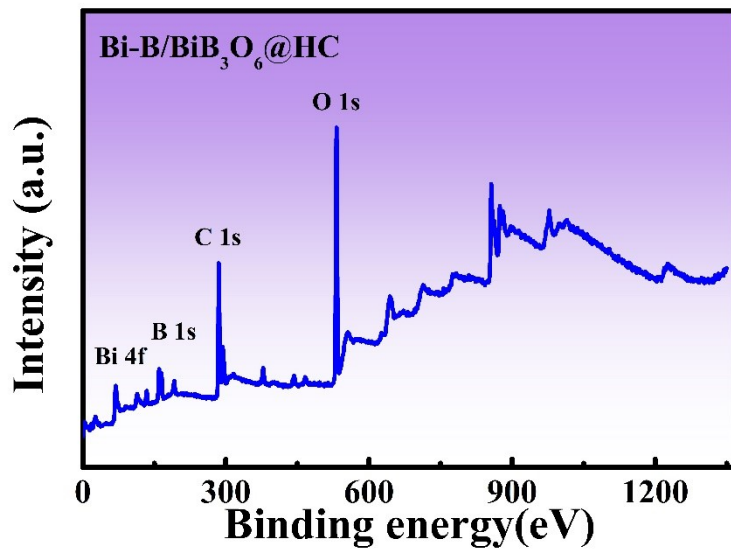

Fig. S14. XPS pattern of HER-cycled Bi-B/Bi<sub>3</sub>O<sub>6</sub>@HC electrode.

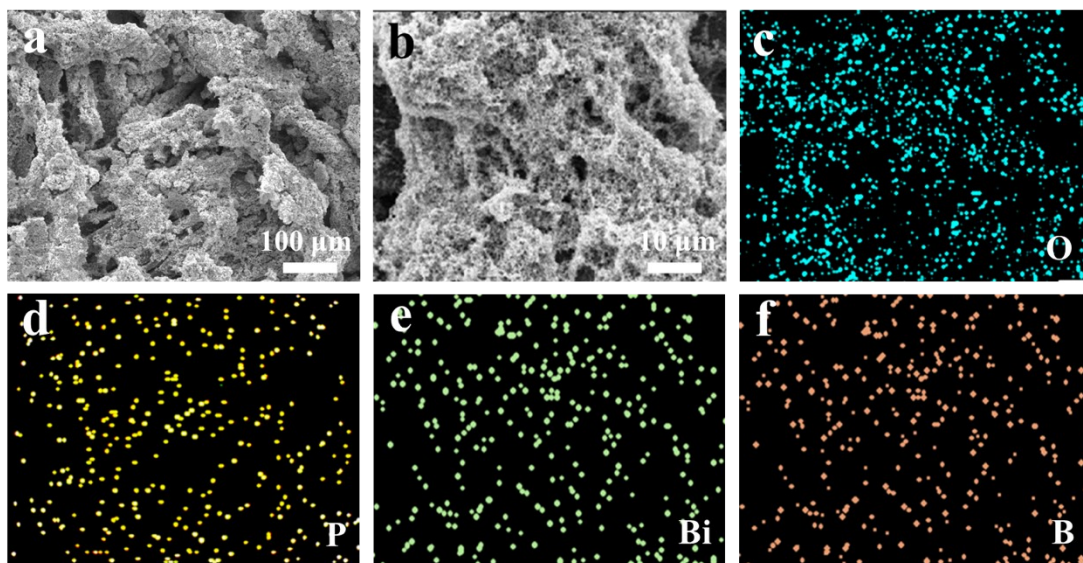

**Fig. S15.** (a-b) SEM images of Bi-B-P/BiB<sub>3</sub>O<sub>6</sub>@HC at different magnification, and corresponding elemental mapping of (c) O element; (d) P element; (e) Bi element; and (f) B element.



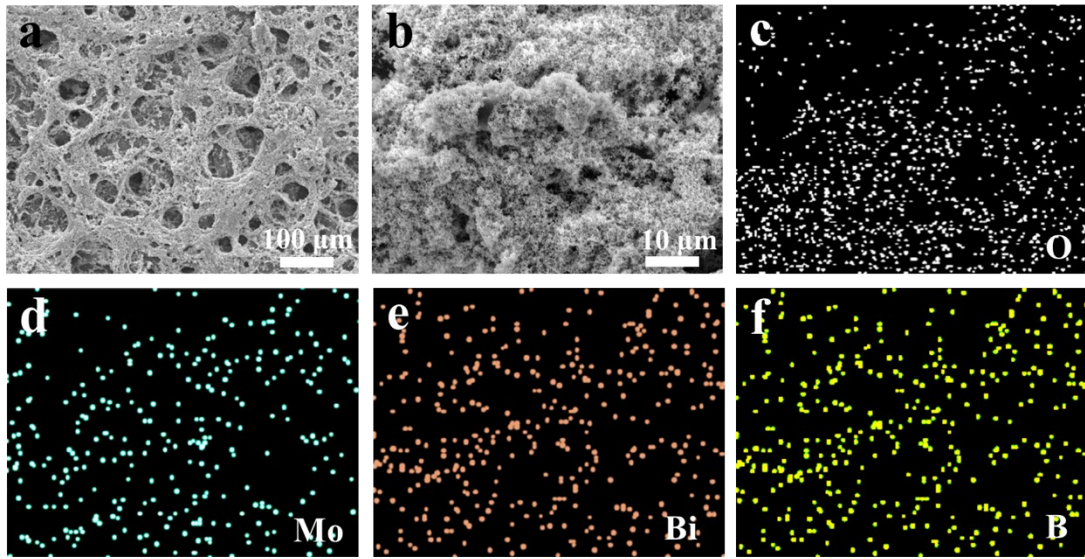

**Fig. S16.** (a-b) SEM images of Bi-B-Mo/ $\text{BiB}_3\text{O}_6$ @Paper at different magnification, and corresponding elemental mapping of (c) O element; (d) Mo element; (e) Bi element; and (f) B element.

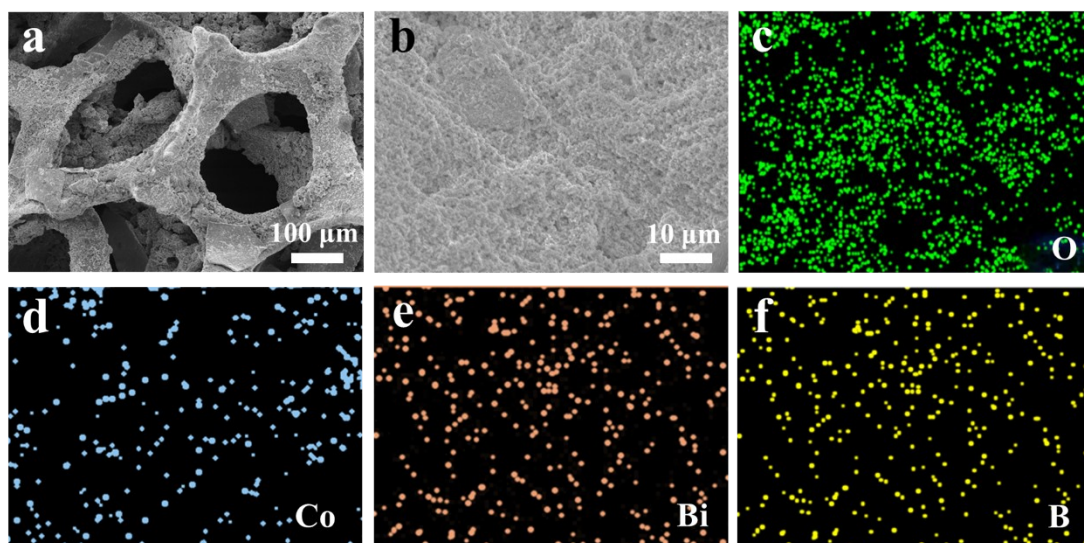

**Fig. S17.** (a-b) SEM images of Bi-B-Co/BiB<sub>3</sub>O<sub>6</sub>@NF at different magnification, and corresponding elemental mapping of (c) O element; (d) Co element; (e) Bi element; and (f) B element.

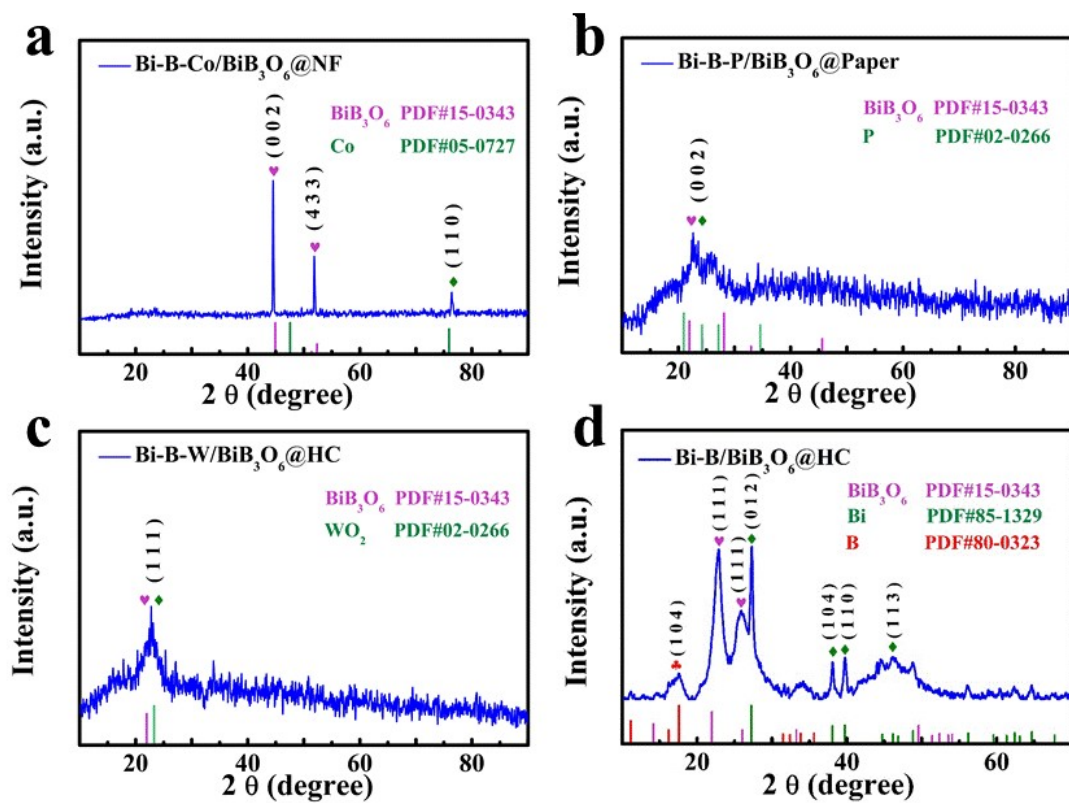

**Fig. S18.** XRD patterns of (a) Bi-B-Co/BiB<sub>3</sub>O<sub>6</sub>@NF; (b) Bi-B-P/BiB<sub>3</sub>O<sub>6</sub>@Paper; (c) Bi-B-W/BiB<sub>3</sub>O<sub>6</sub>@HC; and (d) Bi-B/BiB<sub>3</sub>O<sub>6</sub>@HC.

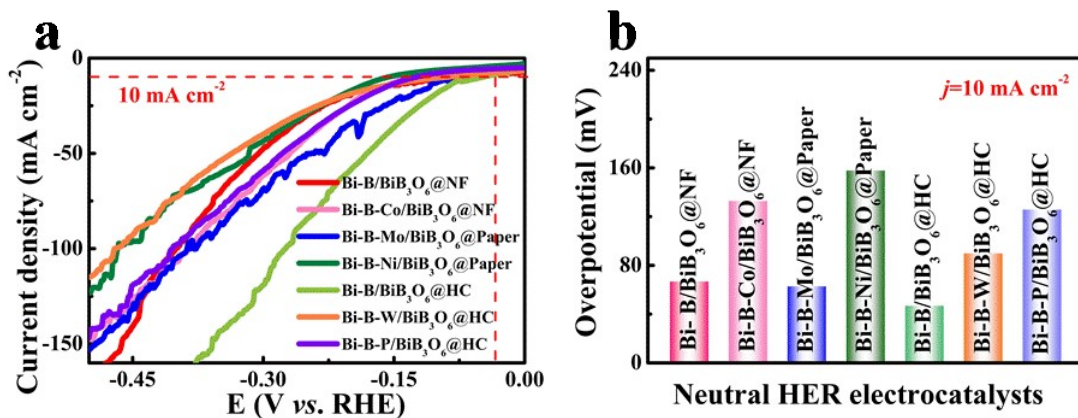

**Fig. S19.** (a) LSV curves and (b) histogram at 10 mA cm<sup>-2</sup> of Bi-B/Bi<sub>3</sub>O<sub>6</sub>@NF, Bi-B-Co/Bi<sub>3</sub>O<sub>6</sub>@NF, Bi-B-Mo/Bi<sub>3</sub>O<sub>6</sub>@Paper, Bi-B-Ni/Bi<sub>3</sub>O<sub>6</sub>@Paper, Bi-B/Bi<sub>3</sub>O<sub>6</sub>@HC, Bi-B-W/Bi<sub>3</sub>O<sub>6</sub>@HC and Bi-B-P/Bi<sub>3</sub>O<sub>6</sub>@HC in 1.0 M KOH + 0.5 M NaCl.

**Table S1.** ICP-AES analysis results of Bi-B based catalytic electrodes.

|                                                      | <b>B</b> | <b>Bi</b> | <b>Ni</b> | <b>W</b> | <b>Mo</b> | <b>P</b> | <b>Co</b> | <b>Atomic ratio</b> |
|------------------------------------------------------|----------|-----------|-----------|----------|-----------|----------|-----------|---------------------|
| Bi-B/BiB <sub>3</sub> O <sub>6</sub> @HC             | 4.52     | 1.38      | -         | -        | -         | -        | -         | 3.28:1              |
| Bi-B/BiB <sub>3</sub> O <sub>6</sub> @HC<br>Post-HER | 3.63     | 1.19      | -         | -        | -         | -        | -         | 3.05:1              |
| Bi-B/BiB <sub>3</sub> O <sub>6</sub> @NF             | 3.5      | 1.09      | -         | -        | -         | -        | -         | 3.21:1              |
| Bi-B-<br>W/BiB <sub>3</sub> O <sub>6</sub> @HC       | 2.47     | 0.92      | -         | 0.17     | -         | -        | -         | 14.52:5.41:1        |
| Bi-B-<br>Ni/BiB <sub>3</sub> O <sub>6</sub> @Paper   | 3.07     | 1.03      | 0.21      | -        | -         | -        | -         | 14.61:4.9:1         |
| Bi-B-<br>Mo/BiB <sub>3</sub> O <sub>6</sub> @Paper   | 4.10     | 1.59      | -         | -        | 0.272     | -        | -         | 15:5.84:1           |
| Bi-B-<br>P/BiB <sub>3</sub> O <sub>6</sub> @HC       | 4.14     | 1.34      | -         | -        | -         | 0.24     | -         | 17.25:5.58:1        |
| Bi-B-<br>Co/BiB <sub>3</sub> O <sub>6</sub> @NF      | 3.36     | 1.08      | -         | -        | -         | -        | 0.22      | 15.27:4.9:1         |

**Table S2.** Comparison of the HER performance of Bi-B/BiB<sub>3</sub>O<sub>6</sub>@HC with other electrocatalysts in PBS according to Figure 2h.

| Catalysts                                | Electrolyte | $\eta_{10}$ (mV) | Tafel slope (mV dec <sup>-1</sup> ) | Morphology                                                                           | Reference        |
|------------------------------------------|-------------|------------------|-------------------------------------|--------------------------------------------------------------------------------------|------------------|
| Bi-B/BiB <sub>3</sub> O <sub>6</sub> @HC | 1.0 M PBS   | 88.5             | 74.6                                | 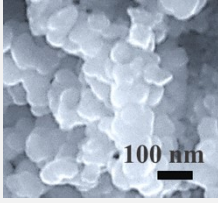   | <b>This work</b> |
| MoS <sub>2</sub> /NLG-3                  | 1.0 M PBS   | 142              | 72.9                                |    | 1                |
| Co-Ni-P/NF                               | 1.0 M PBS   | 95               | 151                                 |   | 2                |
| pFe/FeP                                  | 1.0 M PBS   | 125              | 66                                  |  | 3                |
| Ru/GC                                    | 1.0 M PBS   | 115              | 173.7                               |  | 4                |
| RhCu NWs- 2                              | 0.1 M PBS   | 165              | 211                                 |  | 5                |
| NSOC/CS                                  | 1.0 M PBS   | 103              | 113.7                               |  | 6                |

|                                  |           |     |       |                                                                                      |    |
|----------------------------------|-----------|-----|-------|--------------------------------------------------------------------------------------|----|
| NiRh <sub>2</sub> O <sub>4</sub> | 1.0 M PBS | 156 | 224.4 | 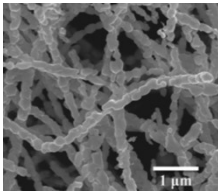   | 7  |
| CoMoNiS-NF-31                    | 1.0 M PBS | 117 | 56    |    | 8  |
| Fe-CoP                           | 1.0 M PBS | 134 | 50.1  |    | 9  |
| MoS <sub>2</sub> /NVO            | 1.0 M PBS | 96  | 70    |   | 10 |
| S-MoP                            | 1.0 M PBS | 140 | 98    |  | 11 |
| Cu@WC                            | 1.0 M PBS | 173 | 119   |  | 12 |
| Co, Mo <sub>2</sub> C-CNF        | 1.0 M PBS | 206 | 92.8  |  | 13 |
| CoSAs-MoS <sub>2</sub> /TiN NRs  | 1.0 M PBS | 203 | 82.7  |  | 14 |

|                                                       |            |       |       |                                                                                      |    |
|-------------------------------------------------------|------------|-------|-------|--------------------------------------------------------------------------------------|----|
| WS <sub>2</sub> /CoS <sub>2</sub> /CC                 | 1.0 M PBS  | 175   | 81    | 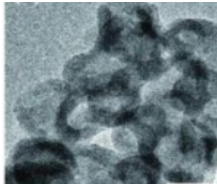   | 15 |
| TM-Mo <sub>2</sub> C@NCF                              | 1.0 M PBS  | 109   | 110   |    | 16 |
| Cu-Ni <sub>3</sub> S <sub>2</sub>                     | 1.0 M PBS  | 128   | 151.0 |    | 17 |
| Mo-CoP/NC/TF                                          | 1.0 M PBS  | 130   | 84.1  |   | 18 |
| K-G <sub>4.0</sub> T <sub>2.0</sub> Mo <sub>1.0</sub> | pH=7       | 150   | 197.2 |  | 19 |
| RuCu NWs                                              | 0.01 M PBS | 190   | 314   |  | 20 |
| Co <sub>9</sub> S <sub>8</sub> /NF                    | 1.0 M PBS  | 193.9 | 168.3 |  | 21 |
| Karst NF                                              | 1.0 M PBS  | 110   | 99    |  | 22 |



$\text{NiS}_{2(1-x)}\text{Se}_{2x}$

1.0 M PBS

124

81

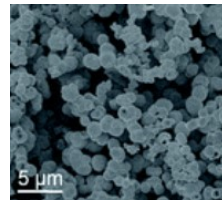

23

## References

1. J. Y. Qin, C. Xi, R. Zhang, T. Liu, P. C. Zou, D. Y. Wu, Q. J. Guo, J. Mao, H. L. Xin and J. Yang, *ACS Catal*, 2021, **11**, 4486-4497.
2. D. Y. Li, L. L. Liao, H. Q. Zhou, Y. Zhao, F. M. Cai, J. S. Zeng, F. Liu, H. Wu, D. S. Tang and F. Yu, *Mater Today Phys*, 2021, **16**, 100314.
3. C. L. Xiao, R. R. Gaddam, Y. L. Wu, X. M. Sun, Y. Liang, Y. B. Li and X. S. Zhao, *Chem Eng J*, 2021, **408**, 127330.
4. S. Zhang, Y. Rui, X. Zhang, R. J. Sa, F. Zhou, R. H. Wang and X. J. Li, *Chem Eng J*, 2021, **417**, 128047.
5. D. Cao, H. X. Xu and D. J. Cheng, *Adv Energy Mater*, 2020, **10**, 1903038.
6. H. Y. Mou, Z. M. Xue, B. L. Zhang, X. Lan and T. C. Mu, *J Mater Chem A*, 2021, **9**, 2099-2103.
7. D. Jin, A. Yu, Y. Lee, M. H. Kim and C. Lee, *J Mater Chem A*, 2020, **8**, 8629-8637.
8. Y. Yang, H. Yao, Z. Yu, S. M. Islam, H. He, M. Yuan, Y. Yue, K. Xu, W. Hao, G. Sun, H. Li, S. Ma, P. Zapol and M. G. Kanatzidis, *J Am Chem Soc*, 2019, **141**, 10417-10430.
9. Y. M. Du, Z. C. Wang, H. D. Li, Y. Han, Y. R. Liu, Y. Yang, Y. J. Liu and L. Wang, *Int J Hydrogen Energ*, 2019, **44**, 19978-19985.
10. P. Chang, S. Zhang, X. M. Xu, Y. F. Lin, X. Y. Chen, L. X. Guan and J. G. Tao, *Chem Eng J*, 2021, **423**, 130196.
11. K. Liang, S. Pakhira, Z. Z. Yang, A. Nijamudheen, L. Ju, M. Y. Wang, C. I. Aguirre-Velez, G. E. Sterbinsky, Y. G. Du, Z. X. Feng, J. L. Mendoza-Cortes and Y. Yang, *ACS Catal*, 2018, **9**, 651-659.
12. M. Q. Yao, B. J. Wang, B. L. Sun, L. F. Luo, Y. J. Chen, J. W. Wang, N. Wang, S. Komarneni, X. B. Niu and W. C. Hu, *Appl Catal B-Environ*, 2021, **280**, 119451.
13. J. Y. Wang, R. L. Zhu, J. L. Cheng, Y. Y. Song, M. Mao, F. F. Chen and Y. L. Cheng, *Chem Eng J*, 2020, **397**, 125481.
14. T. L. L. Doan, D. C. Nguyen, S. Prabhakaran, D. H. Kim, D. T. Tran, N. H. Kim and J. H. Lee, *Adv Funct Mater*, 2021, **36**, 26.
15. X. Mu, J. Gu, F. Feng, Z. Xiao, C. Chen, S. Liu and S. Mu, *Adv Sci (Weinh)*, 2021, **8**, 2002341.
16. J. J. Huang, J. Y. Wang, R. K. Xie, Z. H. Tian, G. L. Chai, Y. W. Zhang, F. L. Lai, G. J. He, C. T. Liu, T. X. Liu, P. R. Shearing and D. J. L. Brett, *J Mater Chem A*, 2020, **8**, 19879-19886.
17. L. Zhang, X. Gao, Y. Zhu, A. Liu, H. Dong, D. Wu, Z. Han, W. Wang, Y. Fang, J. Zhang, Z. Kou, B. Qian and T. T. Wang, *Nanoscale*, 2021, **13**, 2456-2464.
18. Y. J. Li, B. Zhang, W. Y. Wang, X. J. Shi, J. Zhang, R. Wang, B. B. He, Q. Wang, J. J. Jiang, Y. S. Gong and H. W. Wang, *Chem Eng J*, 2021, **405**, 126981.
19. W. T. Zhang, H. Yu, D. H. Tang, Y. Huang, J. J. Wang, L. J. Yang and Z. Zhao, *Int J Hydrogen Energ*, 2021, **46**, 13936-13945.
20. D. Cao, J. Wang, H. Xu and D. Cheng, *Small*, 2020, **16**, 2000924.
21. M. Kim, M. A. R. Anjum, M. Choi, H. Y. Jeong, S. H. Choi, N. Park and J. S. Lee, *Adv Funct Mater*, 2020, **30**, 2002536.
22. X. Q. Gao, Y. D. Chen, T. Sun, J. M. Huang, W. Zhang, Q. Wang and R. Cao, *Energ Environ Sci*, 2020, **13**, 174-182.
23. L. Y. Zeng, K. Sun, Y. J. Chen, Z. Liu, Y. J. Chen, Y. Pan, R. Y. Zhao, Y. Q. Liu and C. G. Liu, *J Mater Chem A*, 2019, **7**, 16793-16802.
